# Supplementary material
Source: PubMed Central journal article supplement (PMC5803761)
Supplement: iox155_supp.pdf [file iox155_supp.pdf]

**Supplementary table 1. List of antibodies used**

| <b>Antibody</b>                                                        | <b>Manufacturer</b> | <b>Catalog #</b> | <b>RRID</b> |
|------------------------------------------------------------------------|---------------------|------------------|-------------|
| Rabbit polyclonal anti-collagen I                                      | Abcam               | ab34710          | AB_731684   |
| Rabbit polyclonal anti-collagen III                                    | Abcam               | ab7778           | AB_306066   |
| Rat anti mouse Ly-6B.2 alloantigen, clone 7/4<br>(Neutrophil/monocyte) | Serotec             | MCA771GA         | AB_324243   |
